# Supplementary material
Source: Royal Society of Chemistry journal article supplement (doi:10.1039/d6ja00105j)

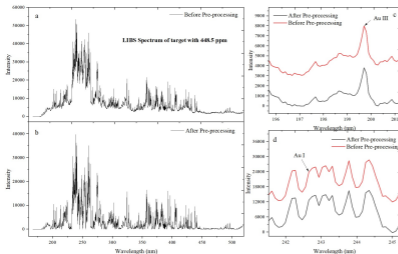

Supplement: d6ja00105j2.pdf [file d6ja00105j2.pdf]

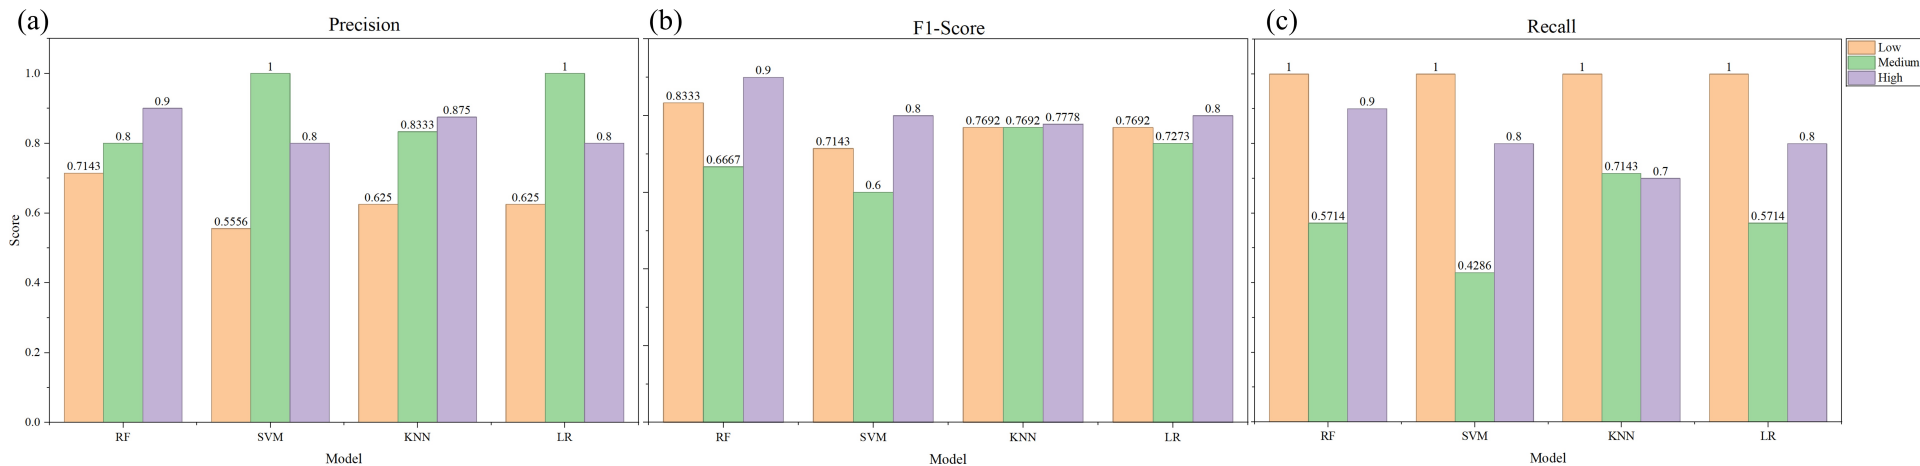

Supplement: d6ja00105j3.pdf [file d6ja00105j3.pdf]

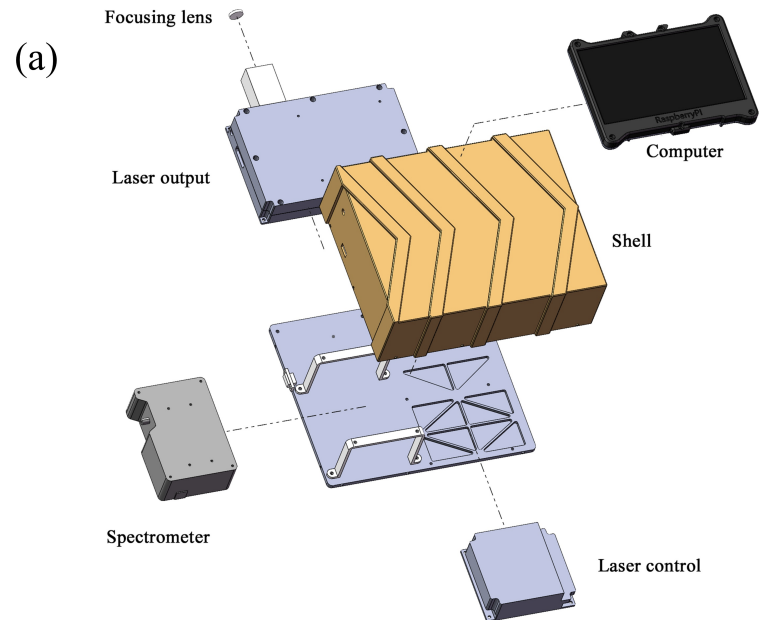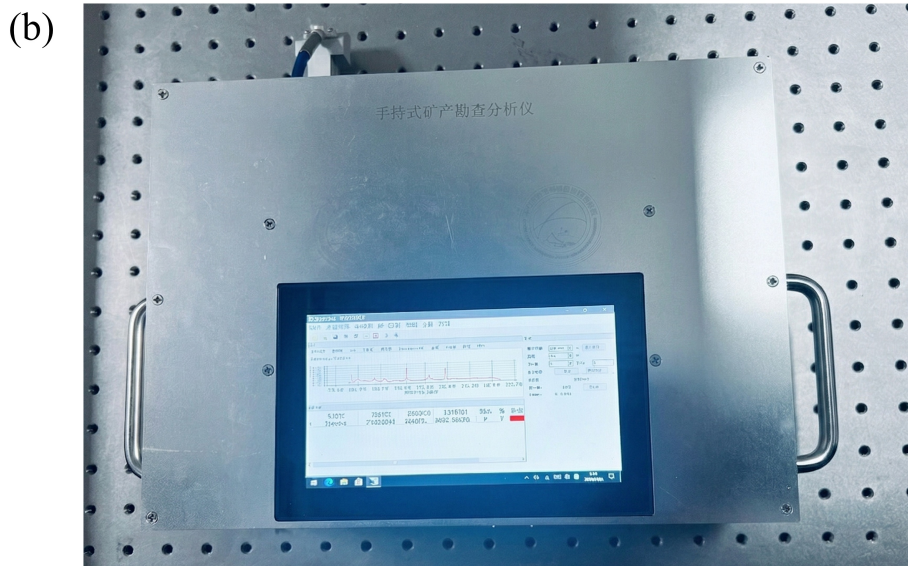

Supplement: d6ja00105j5.pdf [file d6ja00105j5.pdf]

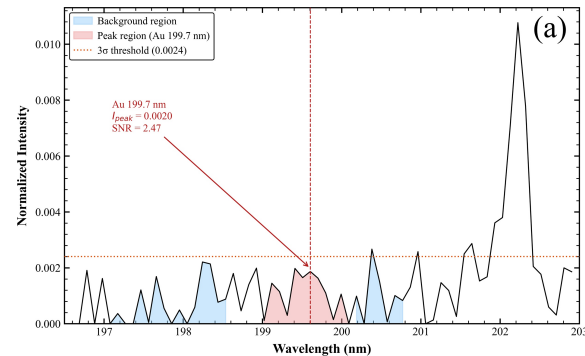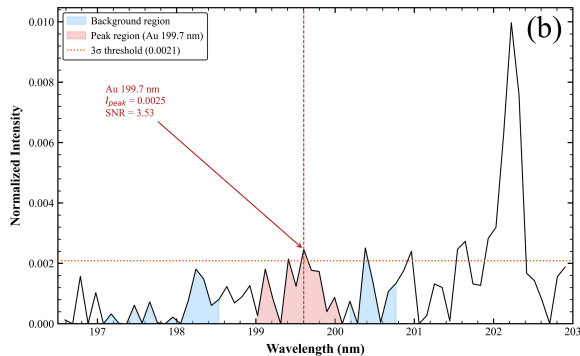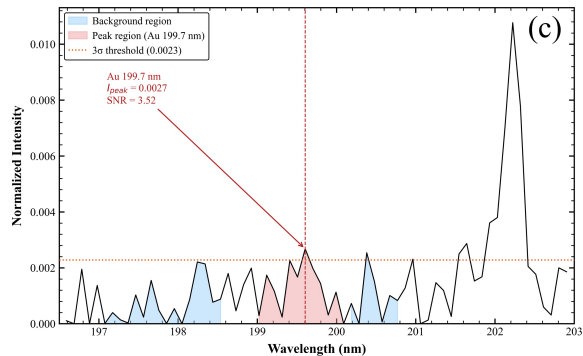

Supplement: d6ja00105j6.pdf [file d6ja00105j6.pdf]
